# Supplementary material for: Expression of SARS-CoV-2-Related Surface Proteins in Non-Small-Cell Lung Cancer Patients and the Influence of Standard of Care Therapy
Source: MDPI journal article supplement (doi:10.3390/cancers14174074), 2022-08-23
Supplement: s1 [file s1]

| Table S1: sACE2 concentrations and patient characteristics |          |            |             |          |                                    |      |      |              |        |      |                 |
|------------------------------------------------------------|----------|------------|-------------|----------|------------------------------------|------|------|--------------|--------|------|-----------------|
| Subject-number                                             | Diagnose | SARS-CoV-2 | sACE2 ng/mL | ACE2 IHC | Treatment during sample collection | EGFR | KRAS | ALK/ROS/cMET | PIK3CA | PDL1 | Cardio-vascular |
| S00000000087                                               | LUAD     | N/A        | 0.000       | 0        | 0                                  | 0    | 1    | 0            | N/A    | N/A  | 0               |
| S00000000090                                               | LUAD     | N/A        | 0.000       | 0        | 0                                  | 0    | 1    | 0            | N/A    | N/A  | 0               |
| S00000000091                                               | LUAD     | N/A        | 0.378       | 1        | 0                                  | 1    | 0    | 0            | N/A    | N/A  | 0               |
| S00000000092                                               | LUAD     | N/A        | 0.000       | 0        | 0                                  | 0    | 1    | 0            | N/A    | N/A  | 0               |
| S00000000095                                               | LUAD     | N/A        | 0.000       | 0        | 0                                  | 0    | 0    | 0            | N/A    | N/A  | 1               |
| S00000000445                                               | LUAD     | N/A        | 0.097       | 3        | 0                                  | 0    | 0    | 0            | N/A    | N/A  | 1               |
| S00000003704                                               | LUAD     | N/A        | 0.185       | 2        | 0                                  | 1    | 0    | 0            | N/A    | N/A  | 0               |
| S00000004014                                               | LUAD     | N/A        | 0.000       | 0        | 0                                  | 0    | 1    | 0            | N/A    | N/A  | 0               |
| S00000004124                                               | LUAD     | N/A        | 0.000       | 1        | 0                                  | N/A  | N/A  | N/A          | N/A    | N/A  | 1               |
| S00000004180                                               | LUAD     | N/A        | 0.000       | 0        | 0                                  | 0    | 0    | 0            | N/A    | N/A  | 1               |
| S00000004192                                               | LUAD     | N/A        | 0.000       | 0        | 0                                  | 0    | 0    | 0            | N/A    | N/A  | 0               |
| S00000004321                                               | LUAD     | N/A        | 0.000       | 0        | 0                                  | 0    | 0    | 0            | N/A    | N/A  | 0               |
| S00000004480                                               | LUAD     | N/A        | 0.000       | 0        | 0                                  | 0    | 1    | 0            | N/A    | N/A  | 0               |
| S00000004535                                               | LUAD     | N/A        | 4.989       | 0        | 0                                  | 0    | 1    | 0            | N/A    | N/A  | 0               |
| S00000004537                                               | LUAD     | N/A        | 0.000       | 0        | 0                                  | 0    | 0    | 0            | N/A    | N/A  | 0               |
| S00000005419                                               | LUAD     | N/A        | 0.000       | 1        | 0                                  | 0    | 0    | 0            | N/A    | N/A  | 0               |
| S00000008419                                               | LUAD     | N/A        | 0.000       | 0        | 0                                  | 1    | 0    | 0            | N/A    | N/A  | 0               |
| S00000009707                                               | LUAD     | N/A        | 0.000       | 0        | 0                                  | 0    | 0    | 1 (ALK)      | N/A    | N/A  | 0               |
| S00000028540                                               | LUAD     | Negative   | 0.000       | N/A      | Pembroluzimab C26                  | 0    | 1    | 0            | N/A    | 90   | 0               |
| S00000028540                                               | LUAD     | Negative   | 0.000       | N/A      | Pembroluzimab C28                  | 0    | 1    | 0            | N/A    | 90   | 0               |
| S00000031111                                               | MPM      | N/A        | 0.000       | N/A      | 0                                  | N/A  | N/A  | N/A          | N/A    | N/A  | 0               |
| S00000031111                                               | MPM      | N/A        | 0.000       | N/A      | Nivolumab C2D1                     | N/A  | N/A  | N/A          | N/A    | N/A  | 0               |
| S00000031113                                               | LUSC     | Negative   | 0.000       | N/A      | Pembroluzimab C16                  | 0    | 0    | 0            | N/A    | N/A  | 0               |

|              |      |          |       |     |                                    |     |     |          |     |     |   |
|--------------|------|----------|-------|-----|------------------------------------|-----|-----|----------|-----|-----|---|
| S00000031114 | LUAD | Negative | 0.000 | N/A | 0                                  | 0   | 1   | 0        | N/A | N/A | 1 |
| S00000031114 | LUAD | Negative | 0.000 | N/A | Carboplatin/Pemetrexed C2          | 0   | 1   | 0        | N/A | N/A | 1 |
| S00000032988 | MPM  | Negative | 0.000 | N/A | Carboplatin/Pemetrexed D15         | N/A | N/A | N/A      | N/A | N/A | 0 |
| S00000032988 | MPM  | Negative | 0.000 | N/A | Nivolumab                          | N/A | N/A | N/A      | N/A | N/A | 0 |
| S00000034883 | LUAD | N/A      | 0.004 | N/A | Cisplatin / Pemetrexed C2d1        | N/A | N/A | 0        | 0   | N/A | 1 |
| S00000034969 | MPM  | N/A      | 0.000 | N/A | 0                                  | N/A | N/A | N/A      | N/A | N/A | 1 |
| S00000034969 | MPM  | N/A      | 0.000 | N/A | Nivolumab C3                       | N/A | N/A | N/A      | N/A | N/A | 1 |
| S00000035647 | LUSC | Negative | 0.709 | N/A | Crizotinib                         | N/A | N/A | 1 (cMET) | N/A | N/A | 0 |
| S00000035647 | LUSC | Negative | 0.953 | N/A | Crizotinib                         | 0   | N/A | 1 (cMET) | N/A | N/A | 0 |
| S00000037304 | N/A  | Negative | 0.000 | N/A | 0                                  | N/A | N/A | N/A      | N/A | N/A | 0 |
| S00000038958 | LUAD | Positive | 0.000 | N/A | 0                                  | 0   | 1   | 0        | N/A | 90  | 1 |
| S00000041919 | LUAD | Negative | 0.000 | N/A | Pemetrexed                         | 0   | 0   | 0        | 1   | N/A | 0 |
| S00000058303 | SCLC | Negative | 0.000 | N/A | Carboplatin/Etoposide/Atezolizumab | N/A | N/A | N/A      | N/A | N/A | 0 |
| S00000058303 | SCLC | Negative | 0.043 | N/A | 0                                  | N/A | N/A | N/A      | N/A | N/A | 0 |
| S00000058413 | LUAD | N/A      | 0.272 | N/A | Osimertinib C2                     | 1   | 0   | 0        | N/A | N/A | 0 |
| S00000058628 | MPM  | Negative | 0.000 | N/A | Carboplatin/Pemetrexed C4D15       | N/A | N/A | N/A      | N/A | N/A | 0 |
| S00000058628 | MPM  | Negative | 0.233 | N/A | 0 (before)                         | N/A | N/A | N/A      | N/A | N/A | 0 |
| S00000058730 | LUAD | Negative | 0.000 | N/A | Pembroluzimab C21                  | 0   | 1   | 0        | N/A | 50  | 1 |
| S00000059213 | MPM  | N/A      | 0.000 | N/A | 0                                  | N/A | N/A | N/A      | N/A | N/A | 0 |
| S00000061629 | MPM  | Negative | 0.000 | N/A | Cisplatin / Pemetrexed C2d1        | N/A | N/A | N/A      | N/A | N/A | 0 |
| S00000061629 | MPM  | Negative | 0.101 | N/A | 0                                  | N/A | N/A | N/A      | N/A | N/A | 0 |
| S00000062513 | MPM  | Negative | 3.091 | N/A | Carboplatin/Pemetrexed             | N/A | N/A | N/A      | N/A | N/A | 1 |
| S00000064166 | LUAD | Negative | 0.000 | N/A | Nivolumab                          | 0   | 0   | 0        | N/A | 0   | 1 |
| S00000064173 | LUAD | Negative | 0.000 | N/A | Pemetrexed / Pembroluzimab C8      | 0   | 0   | 0        | N/A | 30  | 1 |
| S00000064173 | LUAD | Negative | 0.000 | N/A | Pemetrexed / Pembroluzimab C9      | 0   | 0   | 0        | N/A | 30  | 1 |
| S00000068669 | LUAD | Negative | 0.000 | N/A | Pembroluzimab C1D1                 | 0   | 0   | 0        | N/A | N/A | 1 |

|              |      |          |       |     |                              |     |     |          |     |     |     |
|--------------|------|----------|-------|-----|------------------------------|-----|-----|----------|-----|-----|-----|
| S00000075774 | LUAD | Positive | 0.112 | N/A | Cisplatin/Pemetrexed         | 0   | 1   | 0        | N/A | 50  | 0   |
| S00000075935 | LUAD | Negative | 0.029 | N/A | Docetaxel                    | 0   | 0   | 0        | N/A | 20  | 1   |
| S00000075935 | LUAD | Negative | 0.036 | N/A | Docetaxel                    | 0   | 0   | 0        | N/A | 20  | 1   |
| S00000075936 | LUAD | Negative | 0.072 | N/A | Pembroluzimab C36            | 0   | N/A | N/A      | N/A | N/A | 0   |
| S00000075936 | LUAD | Negative | 0.042 | N/A | Pembroluzimab C34            | 0   | N/A | N/A      | N/A | N/A | 0   |
| S00000078721 | LUAD | Positive | 0.045 | N/A | 0                            | 0   | 0   | 0        | 0   | 90  | 0   |
| S00000080975 | LUAD | Negative | 0.000 | N/A | 0                            | 0   | 1   | 0        | N/A | 0   | 1   |
| S00000084435 | SCLC | Negative | 1.218 | N/A | Atezolizumab C17             | N/A | N/A | N/A      | N/A | N/A | 0   |
| S00000085306 | LUAD | Negative | 0.000 | N/A | Pembroluzimab C20            | 0   | 1   | 0        | N/A | 50  | 1   |
| S00000090185 | MPM  | Negative | 0.000 | N/A | 0                            | N/A | N/A | N/A      | N/A | N/A | 0   |
| S00000090185 | MPM  | Negative | 0.000 | N/A | Carboplatin/Pemetrexed C4D15 | N/A | N/A | N/A      | N/A | N/A | 0   |
| S00000091938 | LUAD | Negative | 0.062 | N/A | Atezolizumab                 | 0   | N/A | 0        | N/A | N/A | 1   |
| S00000094876 | LUAD | N/A      | 0.127 | N/A | 0                            | N/A | N/A | N/A      | N/A | N/A | 0   |
| S00000096377 | LUAD | N/A      | 0.107 | N/A | Crizotinib                   | N/A | N/A | 1 (ROS1) | N/A | N/A | 0   |
| S00000096787 | N/A  | N/A      | 2.253 | N/A | 0                            | N/A | N/A | N/A      | N/A | N/A | 1   |
| S00000037600 | HV   | Negative | 0.563 | N/A | N/A                          | N/A | N/A | N/A      | N/A | N/A | 0   |
| S00000037614 | HV   | Negative | 0.000 | N/A | N/A                          | N/A | N/A | N/A      | N/A | N/A | 0   |
| S00000037616 | HV   | Negative | 0.000 | N/A | N/A                          | N/A | N/A | N/A      | N/A | N/A | 0   |
| S00000037617 | HV   | Negative | 0.004 | N/A | N/A                          | N/A | N/A | N/A      | N/A | N/A | N/A |
| S00000038065 | HV   | Negative | 0.000 | N/A | N/A                          | N/A | N/A | N/A      | N/A | N/A | N/A |
| S00000038135 | HV   | Negative | 0.004 | N/A | N/A                          | N/A | N/A | N/A      | N/A | N/A | N/A |
| S00000038250 | HV   | Negative | 0.000 | N/A | N/A                          | N/A | N/A | N/A      | N/A | N/A | N/A |
| S00000038773 | HV   | Negative | 0.000 | N/A | N/A                          | N/A | N/A | N/A      | N/A | N/A | N/A |
| S00000038777 | HV   | Negative | 0.049 | N/A | N/A                          | N/A | N/A | N/A      | N/A | N/A | N/A |
| S00000038779 | HV   | Negative | 0.000 | N/A | N/A                          | N/A | N/A | N/A      | N/A | N/A | N/A |
| S00000038780 | HV   | Negative | 0.000 | N/A | N/A                          | N/A | N/A | N/A      | N/A | N/A | N/A |



|              |    |          |       |     |     |     |     |     |     |     |     |
|--------------|----|----------|-------|-----|-----|-----|-----|-----|-----|-----|-----|
| S00000038950 | HV | Positive | 4.328 | N/A |
| S00000038957 | HV | Positive | 1.538 | N/A |
| S00000039105 | HV | Positive | 0.015 | N/A |
| S00000042572 | HV | Positive | 0.003 | N/A |
| S00000064215 | HV | Positive | 0.002 | N/A |
| S00000066149 | HV | Positive | 0.000 | N/A |
| S00000066348 | HV | Positive | 0.193 | N/A |
| S00000084442 | HV | Positive | 0.000 | N/A |
| S00000085016 | HV | Positive | 0.090 | N/A |
| S00000085086 | HV | Positive | 0.000 | N/A |

LUAD: Lung Adenocarcinoma; LUSC: Lung Squamous Cell Carcinoma; MPM: Malignant Pleural Mesothelioma; HV: Healthy Volunteer; N/A: Not Applicable; C: Cycle; D: Day. Treatment during sample collection. SARS-CoV-2 status during sample collection
